# Supplementary material for: Metallogenic model and deep ore prospecting direction of the Zhazixi Sb-W-Au deposit in Western Hunan, South China
Source: Research Square preprint supplement (doi:10.21203/rs.3.rs-7741922/v1), 2025-10-26
Supplement: Supplementary file 1 [file 8aa9f52cd30b32a960b64a12.xlsx]

## Sheet: Table-1
Table 1. EPMA analytical results of major metal minerals in the Zhazixi deposit (%)							Note: Stb－stibnite; Py－pyrite; Apy－arsenopyrite
point number	As	Al	S	Zn	Sb	Au	Ag	Fe	Cu	Ni	Total
z210-Stb02	0.14	0.97	28.61	0	71.72	0	0	0	0	0.01	101.45
z211-Stb01	0.26	0.24	25.46	0.00	47.46	0.08	0.02	0.36	24.04	0.04	97.96
z211-Stb02	0.14	0.32	25.65	0	48.72	0	0	0.2	24.67	0.04	99.73
z235-Stb02	0.14	0	27.91	0.05	71.71	0.02	0	0.01	0	0.01	99.84
z235-Stb03	0.11	0.01	28.12	0.17	71.65	0.00	0.03	0.02	0.00	0.04	100.15
z210-py03	0.02	0	52.76	0.25	0	1.23	0.05	44.01	0	0.01	98.34
z210-py04	2.13	2.64	45.91	0.14	0	1.08	0.03	38.52	0.02	0	90.47
z002-1-py03	1.97	0.02	50.66	0.04	0	1.14	0	43.66	0.02	3	97.53
z211-py02	0.02	0.01	51.6	0	0	1.19	0	44.53	0.02	0	97.36
z211-py03	0	0	50.9	0.01	0	1.62	0	45.04	0	0	97.57
z235-py01	0	0	53.45	0	0	1.12	0	44.79	0	0.42	99.78
z235-py04	0.08	0.03	47.4	0.22	0	1.17	0	43.5	0.01	0.83	93.23
z002-Apy01	40.07	0.03	21.68	0	0	1.26	0	29.64	0.01	0	92.69
z002-Apy02	42.16	0	22.85	0.11	0	1.32	0	34.76	0.02	0.04	101.26
z002-Apy03	40.21	0	21.65	0	0	1.23	0.07	3.83	0	0	97
2002-1-Apy04	36.45	0.09	23.49	0	0	1.34	0.02	34.81	0.01	0.05	96.25
z002-1-Apy05	26.02	0.26	32.27	0.00	0.00	1.16	0.00	3.38	0.00	0.00	97.09
z002-Apy04	44.57	0	21.27	0.23	0.03	1.28	0	33.87	0	0	101.24
z002-Apy05	42.66	0	22.95	0	0	1.17	0.04	34.43	0	0	101.25

## Sheet: Table-2
Table 2. Analysis results of trace elements and rare earth elements in the Zhazixi deposit(μg/g)									Note: * indicates the value is below the detection limit.
Sample ID	Au	F	Hg	Sb	Ti	Ag	Al	As	Ba	Be	Bi	Ca	Cd	Ce	Co	Cr	Cs	Cu	Fe	Ga	Ge	Hf	In	K	La	Li	Mg	Mn	Mo	Na	Nb	Ni	P	Pb	Rb	Re	S	Sc	Se	Sn	Sr	Ta	Te	Th	Tl	U	V	W	Y
XF-Z-109	0	570	0.107	0.003	0.35	0.06	8.53	32.5	900	2.29	0.08	0.21	<0.02	88.5	15.8	77	11.7	7.8	5.38	20.8	0.2	6.3	0.052	3.08	44.5	10.5	0.84	478	0.34	1.65	7.3	29.5	130	12	111	<0.002	0.58	11	1	2	77.1	0.49	<0.05	7.67	0.45	1.14	76	6.5	29.2
XF-Z-112	0.006	550	0.104	0.004	0.52	0.02	8.71	39.9	1070	2.56	0.12	0.23	0.02	84.9	7.3	78	9.14	11.2	4.21	21.5	0.19	12.9	0.079	3.69	42.6	10.2	0.78	492	0.42	0.53	13.4	22.6	390	3.8	147	<0.002	0.04	15.8	1	4	59.7	0.92	<0.05	10.84	0.6	2.29	96	14.4	35
XF-Z-113	4.9	240	2	12.25	0.16	<0.5	3.25	28230	360	0.9	<2	0.25	<0.5	35.1	3	51	*	19	3.2	10	*	9.6	*	1.39	21.8	*	0.18	76	2	0.02	6.8	16	50	43	*	*	6.33	5		2	*	0.76	*	4.41	*	0.78	34	17	11.8
XF-Z-116	0	680	0.108	0.007	0.47	0.07	9.48	43.7	1070	3.08	0.21	0.15	0.06	85	11.9	100	14.45	31.5	4.49	24.3	0.21	12.6	0.074	4.25	38.9	11.4	0.87	358	0.31	0.76	14.3	31.2	220	19.8	163	<0.002	0.3	15.1	1	4	51.2	0.99	<0.05	11.88	0.69	2.15	90	11.2	54.5
XF-Z-117	0	320	0.228	0.004	0.25	0.11	7.54	27.7	580	1.99	0.13	0.29	0.02	55.3	7.2	37	7.73	11.4	4.38	16.75	0.16	10.5	0.034	2.25	28.6	10.3	0.85	802	0.95	2.45	10	15.5	200	23.1	80.5	<0.002	0.94	7.7	1	2	75.8	0.64	<0.05	7.81	0.38	1.72	42	4.8	22.9
XF-Z-118	0	500	0.027	0.001	0.35	0.08	8.73	12.5	950	2.14	0.23	0.61	<0.02	55.3	10.4	31	4.52	8.5	2.19	20.9	0.18	12.9	0.065	2.91	26.7	36.4	0.54	436	0.37	2.62	9.7	14.1	170	13.1	102.5	<0.002	0.37	11.3	1	3	96.1	0.6	<0.05	7.3	0.42	1.86	55	1.2	32
F3-PM1	0.006	1730	0.069	0.01	0.22	0.04	10.56	275	1740	4.12	0.11	0.81	0.03	70.8	2.1	6	5.93	37.6	1.28	27.5	0.2	13.2	0.045	5.35	32.2	13.9	0.66	153	0.87	0.05	12.8	2.9	3320	6.2	184	<0.002	0.13	8.3	1	3	149	0.91	<0.05	8.54	0.88	4.44	38	8.4	60.8
F3-PM2	0.371	1180	0.537	0.016	0.21	0.08	9.46	12400	1520	3.17	0.29	0.47	0.02	62.4	4.9	10	8.55	34	2.79	24.5	0.2	13.8	0.048	4.97	29.4	23.4	0.58	147	1.25	0.05	12.3	4.7	1180	5.3	162	0.002	1.38	7	1	3	241	0.88	0.2	9.47	0.94	3.72	36	16.8	46.9
F3-PM3	0.064	1320	0.327	0.386	0.19	0.03	9.13	2940	1960	3.15	0.15	0.66	<0.02	60.2	3.5	10	7.36	17.6	1.58	23.2	0.21	12.9	0.04	4.82	29	18.3	0.65	230	0.57	0.04	10.8	4.1	1850	5	160.5	<0.002	0.72	7.4	1	3	122	0.81	0.1	8.53	0.84	3.29	34	9.3	50.7
F3-PM4	0.027	630	0.256	0.114	0.27	0.02	6.74	955	700	3.19	0.12	2.91	<0.02	96.4	5.7	38	28.8	7.4	2.19	16.7	0.24	8.4	0.051	2.61	48.7	32	1.3	1210	0.73	0.05	11.5	11.6	240	7.1	91.3	<0.002	0.48	8	1	3	331	0.72	<0.05	9.33	0.41	1.76	35	34	41.8
F3-PM5	0.151	580	0.562	0.205	0.37	0.06	7.09	3370	1500	5.08	0.13	1.68	0.06	90.9	9.1	58	48.6	12.3	3.1	17.95	0.21	8.7	0.061	2.07	45.8	66.1	1.02	713	0.64	0.05	8.4	18.5	430	15.2	74.3	<0.002	0.69	9.5	<1	2	295	0.56	<0.05	9.89	0.44	1.73	61	72	42.1
F3-PM6	0.008	830	0.171	0.912	0.44	0.03	7.73	54.2	990	2.81	0.13	0.56	0.02	84.9	9.3	76	18.3	13.4	3.09	21.4	0.23	7.9	0.059	3.45	43.5	20.2	0.84	541	0.75	0.04	9.4	21.2	290	10.3	130	<0.002	0.86	12.2	1	2	122.5	0.6	<0.05	9.94	0.67	1.67	83	56	33.9
F3-PM7	0.011	770	0.146	0.211	0.47	0.05	8.01	94.4	1000	2.74	0.1	0.32	<0.02	110	11.3	173	17.7	10.3	3.67	21.8	0.23	11.9	0.069	3.75	54.8	22.1	0.74	472	0.63	0.04	12.1	22.8	200	8.2	137	<0.002	0.9	11	1	3	104.5	0.76	<0.05	11.25	0.59	1.95	75	37	42.3
F3-PM8	0.022	680	0.257	2.67	0.35	0.13	6.44	379	650	2.66	0.1	0.27	0.03	68.6	8.4	59	20	91.3	3.22	17.25	0.32	8.1	0.048	2.82	35.2	20.6	0.75	462	0.22	0.04	8.7	16.2	140	7.2	102.5	<0.002	1.42	9	1	2	103.5	0.39	<0.05	9.12	0.72	1.43	47	5.1	25.2
F3-PM9	0.006	650	0.202	3.94	0.34	0.05	6.08	25.4	690	2.16	0.09	0.13	<0.02	66.5	8.6	47	9.49	8.3	2.75	15.8	0.36	9	0.045	2.83	32.9	9	0.72	325	0.19	0.03	8.3	14.4	100	7.7	103.5	<0.002	1.77	8.5	2	2	69.9	0.33	<0.05	10.38	0.53	1.86	34	3.9	25.2
XF-Z-001	0.342	650	0.565	0.877	0.31	0.06	5.68	9510	630	1.78	0.14	0.25	0.02	44.4	6.5	31	7.8	5.8	3.11	13.7	0.17	6	0.04	2.63	23.3	17.2	0.28	231	0.4	0.04	7.6	6.4	170	6.8	87.1	<0.002	2.42	6.2	1	2	52.5	0.45	<0.05	5.72	0.59	1.14	44	19.7	20.1
XF-Z-002	0.038	890	0.074	0.023	0.18	<0.01	3.81	1050	320	0.63	0.02	0.67	<0.02	47.8	3.9	46	2.8	5.1	0.69	4.88	0.16	5.1	0.009	1.58	24.6	10.7	0.26	356	1.3	0.04	6	4.3	180	1.6	51.5	<0.002	0.29	2.7	1	1	53.3	0.36	<0.05	4.84	0.29	0.72	14	4.5	11.7
XF-Z-003	0.01	930	1	10.35	0.29	<0.5	6.22	38	560	1.9	<2	0.44	<0.5	65.1	3	76	*	19	2.57	10	*	22.8	*	2.94	36.1	*	0.75	442	<1	0.09	4.4	9	90	40	*	*	4.13	7	*	2	*	0.56	*	7.79	*	1.23	49	11	28.6
XF-Z-004	0.08	1490	1	8.47	0.48	<0.5	7.46	305	1010	3.1	<2	0.58	<0.5	100	10	42	*	16	3.06	20	*	23.1	*	3.59	52.5	*	0.62	275	<1	0.04	3.9	26	2170	27	*	*	4.51	13	*	3	*	0.46	*	6.54	*	1.45	75	29	88.5
XF-Z-005	0	500	0.058	0.022	0.24	0.02	4.38	7	440	1.25	0.02	0.29	<0.02	44.4	4.8	56	5.01	7.1	2.39	10.6	0.16	5.4	0.023	1.6	22.3	14.5	0.59	407	0.76	0.87	5.1	6.9	130	1.6	57.6	<0.002	0.13	6.2	<1	1	54	0.35	<0.05	5.82	0.25	1	42	6.3	13.3
XF-Z-006	0.015	1090	0.396	0.023	0.4	0.06	7.38	342	1020	2.22	0.16	0.29	0.83	68.5	13.4	92	7.02	21.2	3.69	20	0.2	6.3	0.062	3.61	35.9	10.9	0.67	398	4.77	0.05	9.1	33.4	170	36.5	130	<0.002	0.88	13.3	1	3	68.9	0.63	<0.05	9.44	0.58	1.68	90	22	25.6
XF-Z-007	0.314	730	1.432	0.014	0.36	0.08	5.57	3050	800	1.76	0.12	0.28	4.2	64.1	15.7	85	6.14	15.2	3.43	14.75	0.19	9.5	0.056	2.68	33.6	19.1	0.43	322	41.1	0.04	8.6	35.7	140	35.6	90.4	<0.002	1.8	9.8	1	5	65.5	0.54	<0.05	8.56	0.53	1.38	64	29	17.5
XF-Z-008	0.016	1250	0.544	0.012	0.28	0.02	9.47	55.6	1420	2.99	0.11	0.48	1.54	104.5	6	37	8.81	6.1	3.14	26.6	0.25	7.3	0.059	4.92	53.9	18.4	0.78	396	1.06	0.04	12.2	12.2	250	6.5	169	<0.002	0.61	9.3	1	3	120.5	0.82	<0.05	11.9	0.77	2.07	48	22	36
XF-Z-009	0.049	340	<1	18.7	0.12	<0.5	2.03	250	180	0.8	<2	0.38	<0.5	26.9	2	46	*	23	1.11	<10	*	8.7	*	0.91	20	*	0.25	222	1	0.02	7.3	11	70	59	*	*	8.33	3	*	4	*	0.53	*	3.43	*	0.52	24	17	8.6
XF-Z-010	0.016	340	0.037	1.95	0.04	0.02	1.68	85.8	170	0.43	0.02	0.37	<0.02	15.6	2.7	40	1.17	3.6	0.77	2.61	0.2	1.8	0.006	0.67	8.9	4	0.09	123	1.2	0.03	0.3	3.8	100	1.6	22	<0.002	1.21	1.4	1	<1	29.9	<0.05	<0.05	1.94	0.17	0.43	7	0.5	5.8
XF-Z-014	0.005	820	0.125	0.004	0.26	0.04	6.88	124	690	2.27	0.11	0.31	<0.02	66.7	16.4	62	6.11	8.9	2.92	19.6	0.22	11.7	0.049	2.53	32.5	8.5	0.4	265	0.82	1.21	9.5	17.4	120	15.7	93.6	<0.002	0.42	8.1	1	3	52.8	0.69	<0.05	10.48	0.4	2.58	57	7.6	36.4
XF-Z-015	0.557	530	1	21.6	0.02	<0.5	0.44	10400	40	<0.5	<2	0.28	<0.5	5.6	1	26	*	24	1.26	<10	*	1.2	*	0.18	7.6	*	0.06	47	2	0.01	2.8	8	20	33	*	*	9.78	1	*	<1	*	0.46	*	0.6	*	0.1	12	3	2.4
XF-Z-018	0.437	1160	1.076	0.643	0.45	0.5	9.11	149.5	960	2.65	0.19	0.72	0.06	83.5	5.5	90	12.95	17.8	2.82	25.7	0.47	11.4	0.059	4.27	43.4	16.3	0.54	289	18.15	0.47	8.7	17.3	130	70.9	155	0.002	2.73	12.9	1	3	104	0.5	<0.05	10.6	0.78	2.72	83	12.7	28.6
XF-Z-021	0.008	640	0.311	4.53	0.29	0.07	8.15	37.3	1500	2.97	0.09	2.5	0.03	68.3	7.7	36	6.73	7.6	2	21.2	0.39	13.5	0.049	3.43	33.9	4.4	0.95	339	1.71	0.71	11.3	10.8	270	19.2	130	<0.002	2.44	9.2	1	3	174	0.52	<0.05	9.85	0.72	3.01	40	0.7	32
XF-Z-022	0.01	730	0.919	0.059	0.68	0.14	9.95	32.6	1370	3.73	0.36	0.33	1.16	112.2	10.6	64	8.46	12.9	2.11	27.2	0.28	18.5	0.087	4.16	50.1	14.5	0.68	321	2.12	1.66	23.1	13.3	160	83.9	158.5	<0.002	0.58	14.9	1	5	72.5	1.39	0.07	17.88	0.76	2.86	89	10.9	41.5
XF-Z-023	0.007	370	0.106	0.017	0.44	0.13	8.13	41.4	1160	2.94	0.16	0.67	<0.02	204	12.5	85	6.98	12.4	2.44	24.6	0.38	15.5	0.073	3.46	109.5	12.5	0.87	599	1.26	1.09	16.2	23.9	110	101.5	139.5	<0.002	0.45	13.8	1	4	66.9	1	0.05	11.72	0.65	4.44	98	4.6	45.5
KZ006-H8	0.454	260	0.15	0.004	0.09	0.12	2.56	3160	530	0.99	0.05	<0.01	0.61	28.4	4	21	2.9	15.6	1.29	8.98	0.17	4.5	0.015	1.21	14.2	11.2	0.17	195	0.37	0.04	4.1	6.1	30	27.5	45.7	<0.002	0.33	2.5	2	1	28.6	0.33	0.05	5.79	0.23	1	18	6.6	12.1
KZ006-H9	0.006	460	0.204	0.005	0.21	0.1	5.38	45.1	780	2.14	0.05	0.21	0.28	64.7	5.9	41	4.59	16	2.19	16.55	0.18	8.7	0.032	2.39	33.3	21.4	0.49	306	0.29	0.04	8.5	9.6	70	13.9	89.2	<0.002	0.06	4.7	1	3	51.5	0.68	<0.05	13.04	0.4	1.86	32	9.2	26.8
KZ006-H10	0.044	290	0.127	0.003	0.18	0.04	3.98	417	710	1.73	0.01	0.21	0.35	39.1	7.3	31	3.12	8.3	2.22	12.7	0.17	4.2	0.028	1.48	21.9	13.5	0.51	232	0.32	0.03	4.4	13.6	50	38.6	55.7	<0.002	0.06	3.2	1	2	27.8	0.3	<0.05	5.75	0.26	1	31	5.9	12.7
KZ006-H11	1.72	450	0.736	0.638	0.22	0.13	4.75	8510	740	1.75	0.07	0.18	0.61	55.9	8	47	5.56	10.9	3.65	15.85	0.21	4.2	0.033	1.91	30.6	26	0.35	117	0.39	0.25	6.6	18.1	60	27.5	70.8	<0.002	2.22	4.4	2	2	53.4	0.41	0.07	6.27	1.55	0.86	38	13	13.7
KZ006-H12	0.505	320	0.208	0.007	0.23	0.08	5.29	2880	750	1.75	0.12	0.31	0.19	59.1	5.7	43	4.55	5.9	2.21	14.5	0.19	5.4	0.036	2.01	32.8	13.3	0.35	278	0.6	0.55	7.1	13.3	90	19	73.2	<0.002	0.69	4.8	2	2	62.5	0.46	0.1	7.18	0.38	1	36	11.8	14.1
KZ006-H20	0.368	160	<1	17.25	0.04	<0.5	1.81	1720	260	0.5	<2	0.17	0.8	22.2	2	14	*	18	1.41	<10	*	5.1	*	0.79	18.1	*	0.07	104	2	0.03	11.2	9	50	33	*	*	8.08	1	*	1	*	0.56	*	1.77	*	0.32	11	5	6.7
KZ006-H21	1.09	330	1	9.56	0.14	<0.5	4.2	8060	770	1.3	2	0.27	<0.5	53.1	5	36	*	17	2.42	10	*	13.2	*	1.91	30.7	*	0.22	157	<1	0.04	8	13	110	43	*	*	5.57	4	*	2	*	0.29	*	5.89	*	0.92	26	9	14.8
KZ006-H22	0.098	410	0.142	0.071	0.2	0.13	5.93	837	840	1.6	0.08	0.42	0.16	65.3	6	41	4.46	14.3	1.87	13.4	0.18	6.9	0.033	2.67	32.5	9.4	0.32	298	0.63	0.06	8.5	12.5	90	21.7	90.9	<0.002	0.88	5.5	1	3	87.5	0.6	<0.05	7.28	0.49	1.43	32	8	16.9
KZ0604-H6	1.13	370	0.179	0.035	0.28	0.12	4.63	9940	760	1.4	0.05	0.26	0.66	43.3	5.1	50	4.61	17.7	4.16	12.3	0.18	6.6	0.033	1.55	21.9	15.2	0.31	450	0.61	0.88	6.3	12.7	130	32.1	61.2	<0.002	0.61	6.2	2	3	63.6	0.44	0.22	6.2	0.31	1.57	55	15	16.5
KZ0604-H9	0.842	410	0.224	1.69	0.18	0.07	4.07	5150	670	1.39	0.1	0.4	0.09	45.6	3.9	31	7.46	12.8	2.77	12.05	0.2	5.4	0.038	1.64	23.5	23.4	0.46	396	0.37	0.32	6.7	11.9	280	15.5	67.7	<0.002	1.14	5.1	11	2	86.7	0.46	0.06	5.38	0.43	1.14	30	8.9	24
[truncated: 2 more columns]

## Sheet: Table-3
Table 3. S isotopic composition in the Zhazixi ore district (‰)
Sample ID	sampling location	testing object	δ34S
XF-Z-001	quartz vein in F3 footwall at -250m level	pyrite	9.13
Z-BW005	No.19 vein at 271m level	pyrite	8.25
XF-Z-221	quartz vein in F3 footwall at -70m level	pyrite	6.12
Z-301	drilling U-KZ0006 at 297.66m level	pyrite	0.25
XF-Z-003	No.9 vein in Line 0 at -250m level	stibnite	4.8
XF-Z-015	No.103 vein in Line 0 at -70m level	stibnite	5.68
XF-Z-113	No.40 vein in Line 3 at -70m level	stibnite	5.38
Z-BW004	Scheelite-bearing stibnite ore at 325m level	stibnite	4.39
U-KZ0001-H2	No.101 vein in Line 0 at -275m level	high grade stibnite	12.9
U-KZ0001-H6	No.9-11 vein in Line 0 at -350m level	high grade stibnite	10.34
XF-Z-104	No.101 vein in Line 1 at -250m level	high grade stibnite	12.28
XF-Z-113	No.40 vein in Line 3 at -70m level	high grade stibnite	7.74
XF-Z-015	No.103 vein in Line 3 at -70m level	high grade stibnite	8.3
XF-Z-021	No.40 vein in Line 0 at 325m level	high grade stibnite	11.6
KZ0604-H9	No.9 vein in Line 6 at -638m level	high grade stibnite	9.54
XF-Z-001	quartz vein in F3 footwall at -250m level	low grade stibnite	13.8
KZ0006-H11	No.103 vein in Line 0 at -680m level	low grade stibnite	5.81
KZ0604-H6	No.9-11 vein in Line 6 at -472m level	low grade stibnite	11.04
-160-F3-PM2	quartz vein in F3 footwall at -160m level	weak mineralized broken altered rock from F3	9.24

## Sheet: Table-4
Table 4. Microthermometry results of fluid inclusions in the Zhazixi deposit
Sample ID	Minerals determined	Number of fluid inclusions	homogenization temperature (℃)		salinity (wt%)		sampling location
			range	average value	range	average value
Z-234	quartz	4	184～221	211	18.4～21.1	19.2	quartz vein in F3 hanging wall
Z-235	quartz	5	204～218	215	17.3～20.3	18.9	quartz vein in F3 footwall
Z-216	quartz	11	177～244	203	18.4～24.8	21.4	No.9 vein in Line 0 at -70m level
Z-217	quartz	5	201～223	211	18.4～21.3	20.3	No.101 vein in Line 0 at -70m level
Z-220	quartz	4	145～222	194	9.9～11.8	10.8	quartz vein in F3 footwall at -70m level
Z-229	quartz	5	196～214	206	17.1～18.5	17.8	No.9 vein in drilling ZK0006
